# Supplementary material for: Upconverting/magnetic: Gd2O3:(Er3+,Yb3+,Zn2+) nanoparticles for biological applications: effect of Zn2+doping
Source: Royal Society of Chemistry journal article supplement (doi:10.1039/c5ra11888c), 2015-01-01
Supplement: c5ra11888c1.pdf [file c5ra11888c1.pdf]

## Supporting Information 1 (SI1)

**Upconverting/magnetic:  $\text{Gd}_2\text{O}_3:(\text{Er}^{3+}, \text{Yb}^{3+}, \text{Zn}^{2+})$  nanoparticles for biological applications:**

**Effect of  $\text{Zn}^{2+}$  doping**

*Izabela Kamińska\*, Krzysztof Fronc, Bożena Sikora, Matthew Mouawad, Aleksander Siemiarczuk, Maciej Szewczyk, Kamil Sobczak, Tomasz Wojciechowski, Wojciech Zaleszczyk, Roman Minikayev, Wojciech Paszkowicz, Piotr Stępień, Piotr Dziawa, Kamil Ciszak, Dawid Piątkowski, Sebastian Maćkowski, Miron Kaliszewski, Maksymilian Włodarski, Jarosław Młyńczak, Krzysztof Kopczyński, Mariusz Łapiński and Danek Elbaum*

## 1. Experimental section

### 1.1 Synthesis of NPs

For the preparation of  $\text{Gd}_2\text{O}_3:(\text{Er},\text{Yb},\text{Zn})$  NPs we applied a microwave-induced solution combustion synthesis (Fig. S1a). Stoichiometric amounts of substrates were used for the production process. Urea (Sigma Aldrich) was used as a reducer and nitrates of gadolinium, erbium, ytterbium (Sigma Aldrich) and zinc (Chempur), as oxidants. The mixture chemical compositions were summarized in Table S1.

Subsequently the mixtures were dissolved in a minimum amount (20 ml) of deionized water and the resulting solution was warmed in a microwave oven to 500 °C (750 W). During the reaction the evaporation of water, frothing of the mixture and spontaneous combustion took place (Fig. S1b, c, d). The resulted fluffy mass (Fig. S1e) was grounded in an agate mortar to obtain a powder (Fig. S1f). We obtained six samples of gadolinium oxide  $\text{Gd}_2\text{O}_3$  NPs doped with  $\text{Er}^{3+}$ ,  $\text{Yb}^{3+}$  containing various concentrations of  $\text{Zn}^{2+}$  (Fig. S1g). The resulting material was calcined in a furnace in the air atmosphere at 900 °C for 2 h. In order to separate the NPs from each other, during the MiSCs synthesis, 3 mM, 6 mM, 8 mM and 11 mM of NaCl was added.<sup>1</sup> The molar ratio of NaCl ions to the metal ions used in the reaction was 0.6. After the combustion process NaCl was removed by dissolution in water.

### 1.2 Coating with PVP

Samples of the  $\text{Gd}_2\text{O}_3:(\text{Er},\text{Yb},\text{Zn})$  NPs (1.4 g) was dissolved in 40 ml of ethanol. 0.5 mmol of a PVP polymer (polyvinylpyrrolidone) was dissolved in 20 ml of ethanol. Then both solutions were mixed, stirred and heated at 45 °C. This temperature was maintained for 6 h. The solution was next cooled down to room temperature, centrifuged at 22 °C for 15 min at a speed of 6000 rpm and subsequently dried at a temperature of 60 °C.

### 1.3 Absolute quantum yield measurements

The absolute quantum yield was measured using a spectrofluorimeter QuantaMaster-40 from Horiba – PTI with an extended Hamamatsu R2658 photomultiplier (180 nm – 1010 nm) equipped with an integrating sphere (Fig. S2) and SDL-980-LM-1000MFL laser (Shanghai Dream Lasers). Measurements were made at 597.7 mW, 289.7 mW, 207.4 mW, 68.3 mW, 58.3 mW, 42 mW, 37.6 mW, 20.5 mW, 14.7 mW, which correspond to a laser power densities: 19  $\text{W}\cdot\text{cm}^{-2}$ , 9.2  $\text{W}\cdot\text{cm}^{-2}$ , 6.6  $\text{W}\cdot\text{cm}^{-2}$ , 2.2  $\text{W}\cdot\text{cm}^{-2}$ , 1.9  $\text{W}\cdot\text{cm}^{-2}$ , 1.3  $\text{W}\cdot\text{cm}^{-2}$ , 1.2  $\text{W}\cdot\text{cm}^{-2}$ , 0.7  $\text{W}\cdot\text{cm}^{-2}$  and 0.5  $\text{W}\cdot\text{cm}^{-2}$ . Illuminated spot had diameter of approximately 2 mm. Neutral density attenuating filters were used for varying the power of the excitation.

### 1.4 Photoluminescence

The photoluminescence (PL) spectra in the visible (VIS) and in the infrared (IR) regions were measured with a Jobin Yvon-SPEX 270 M monochromator. The excitation ( $\lambda_{\text{exc}} = 980 \text{ nm}$ )

source was an IR laser diode (Lumics model LU0980D300-DNA014). For the measurement of PL in the VIS region from 500 nm to 700 nm, Shortpass Filter FES0700 (Thorlabs) was applied. Longpass Filter FEL1000 (Thorlabs) was used for measurement of luminescence in the IR range (1000 nm – 1060 nm). Powdered samples were measured by placing them in-between two quartz slides. PL of NPs was also measured in dimethyl sulfoxide (DMSO). Solution (0.02 mg·ml<sup>-1</sup>) sample with 5 % Zn<sup>2+</sup> was sonicated in an ultrasonic scrubber for 15 minutes, and then measured in a 3 ml quartz cuvette.

### 1.5 Luminescence decay and luminescence maps

In the experiment we used scanning confocal microscope based on the Nikon Eclipse Ti-s microscope body. The microscope was equipped with high numerical aperture objective (Nikon 60x NA 1.4 OIL) and an infrared 1 mW laser operating at 980 nm. Samples were mounted on a piezo-electric stage (PI-517, Physik Instrumente) operating with resolution of about 10 nm. The detection of emission was carried out with an avalanche photodiode (SPCM-AQRH-14, PerkinElmer) and a set of band pass filters (550/40 nm, 650/30 nm, Chroma) dedicated for Er<sup>3+</sup> emission lines as well as 2P BS 780 DCSPXR dichroic mirror. For time-resolved experiments we used MSA-300 multiscaler card (Becker&Hickl) and function generator (Keithley 3390) which served as a trigger source. For spectrally-resolved measurements we used Shamrock SR-500 (Andor) monochromator coupled with EMCCD camera (Newton 970, Andor). The spatial resolution of the microscope set-up was about 500 nm.

### 1.6 Excitation-emission maps

The experimental setup used for the excitation-emission NPs measurements was shown in Fig. S3. The sample (powdered) was placed between holder and a thin quartz window. The sample was excited by a Tunable Nd:YAG-Laser System NT342B-10 (EXPLA). Emission spectrum was collected via a fiber connected to CCD spectrometer. The FES0700-1 (Thorlabs) filter was used to cut off the laser excitation line from collected spectra. The excitation power of the laser was monitored during the experiment by diverting 10% of the beam to the power meter.

#### *Excitation source*

Tunable Nd:YAG-Laser System NT342B-10 comprises of a pump laser NL300, harmonics generators (SHG, THG) and optical parametric oscillator (OPO).

#### *Measurements*

The samples were excited in the range of 900 nm – 1002 nm with the 3 nm steps. The emission spectra were recorded in a range from 286 nm to 840 nm with 0.3 nm steps. Each spectrum was averaged from the spectra resulting from 10 excitation impulses. During the measurements the energy of laser pulses was measured for spectral correction.

### 1.7 Magnetic properties

Magnetic properties were studied using Superconducting Quantum Interference Device (SQUID) magnetometer at temperatures from 5 K to 200 K. Measurements of magnetization as a

function of temperature, both zero-field-cooled (ZFC) and field-cooled (FC) regimes were carried out at applied external magnetic field of 10 Oe as well as magnetic field dependence at  $T = 5$  K.

## 1.8 Toxicity tests

At the first stage the NPs were sonicated for 20 minutes. Then the transfection mixture was prepared by diluting solutions of the particles in a sterile ddH<sub>2</sub>O to a final concentration of 0.5, 1, 5, 10, and 50  $\mu\text{g}\cdot\text{ml}^{-1}$  and by adding the transfection reagent (Invitrogen Lipofectamine 2000; 20  $\mu\text{l}$ /1.5 ml of particle mixture). The mixtures were incubated for 20 minutes at room temperature. Meanwhile, HeLa cells were washed with phosphate buffer saline (PBS) pH 7.4 and detached by 10 min incubation with 0.025% Trypsin-EDTA (Sigma) at 37 °C. Trypsin was neutralized by addition of fresh medium supplemented with 10% fetal bovine serum. Cells were counted in Thoma chamber and diluted to final concentration of  $10^5$   $\text{ml}^{-1}$ . 10  $\mu\text{l}$  of transfection solution and 90  $\mu\text{l}$  of cell suspension (approx. 9000 cells) were added per well of a 96-well plate in an automatic Janus pipetting workstation (Perkin Elmer). Cells were incubated at 37 °C for 24 h or 48 h. Then, 10  $\mu\text{l}$ /well of PrestoBlue reagent (Invitrogen) was added. After 30 min incubation in darkness at 37 °C fluorescence of PrestoBlue (excitation 540 nm, emission 590 nm) was measured in Paradigm microplate reader (Beckmann Coulter).

## 1.9 Cell culture and laser scanning upconversion luminescence microscopy imaging in vitro

The  $\text{Er}^{3+}$ ,  $\text{Yb}^{3+}$  and  $\text{Zn}^{2+}$  doped gadolinium oxide NPs were introduced into HeLa cells, using the previously reported procedure Kamińska *et al.*<sup>2</sup>. Transfection agent (Lipofectamine 2000) was used to introduce the NPs into the cells. The cells were cultured in 6 well plates ( $6\times 10$   $\text{cm}^2$ ) at a density of  $10^5$  per plate. The cells were incubated with the  $\text{Gd}_2\text{O}_3:1\% \text{Er}^{3+}, 18\% \text{Yb}^{3+}, 50\% \text{Zn}^{2+}/\text{PVP}$  NPs and with the transfection agent. Solutions were prepared with varying concentration of particles: 1  $\mu\text{g}\cdot\text{ml}^{-1}$ , 25  $\mu\text{g}\cdot\text{ml}^{-1}$ , 40  $\mu\text{g}\cdot\text{ml}^{-1}$  and 50  $\mu\text{g}\cdot\text{ml}^{-1}$  and then incubated with HeLa cells for different times: 4 h, 10 h, 24 h. Then, the cells were fixed by filtered paraformaldehyde. Bioimaging of HeLa cells, incubated with the  $\text{Gd}_2\text{O}_3:1\% \text{Er}^{3+}, 18\% \text{Yb}^{3+}, 50\% \text{Zn}^{2+}/\text{PVP}$  NPs, was performed using a commercial Confocal Laser Scanning Microscope (Zeiss 710 NLO) with a NIR femtoseconds laser (Coherent, Chameleon). The samples were excited by a 980 nm and two visible UC emission channels were detected at green (507 nm – 585 nm) and red (620 nm – 710 nm) spectral regions. Autofluorescence of HeLa cells was observed when excited at 488 nm with an argon laser and detected at 508 nm – 585 nm.

## 1.10 Powder X-ray Diffraction

X-ray diffraction was applied for evaluation  $\text{Gd}_2\text{O}_3:(\text{Er}, \text{Yb}, \text{Zn})$  NPs (powdered) crystal structure and size. NPs were investigated using a Philips X'Pert Pro Alpha1 MPD diffractometer (Panalytical) ( $\lambda = 1.5406$  Å).

## 1.11 Transmission Electron Microscopy

The study was performed using transmission electron microscope JEOL JEM 2000EX operating at 200 kV. Images were recorded on photographic plates, and then using a scanner Nikon LS-8000 were processed into digital form for further analysis. Observations were performed using

diffraction contrast techniques: the bright-field (image forming with the incident beam) and the dark-field (image forming with a diffracted beam).

### 1.12 Scanning Electron Microscopy

SEM was used to assess the NPs surface morphology. In addition, EDX measurements were performed to confirm the presence of the elements in the tested samples.

**Table S1.** Summary of the obtained materials.

| The content of<br>$\text{Zn}^{2+}$ in relation<br>to the amount of<br>$\text{Gd}^{3+}$ in the<br>starting material<br>$\text{Gd}_2\text{O}_3$ :<br>1% $\text{Er}^{3+}$ ,<br>18% $\text{Yb}^{3+}$<br>(%) | Mass of<br>reducer                                                  | Mass of oxidants                                                                                                |                                                                                                                      |                                                                                                                         |                                                                                                      |
|---------------------------------------------------------------------------------------------------------------------------------------------------------------------------------------------------------|---------------------------------------------------------------------|-----------------------------------------------------------------------------------------------------------------|----------------------------------------------------------------------------------------------------------------------|-------------------------------------------------------------------------------------------------------------------------|------------------------------------------------------------------------------------------------------|
|                                                                                                                                                                                                         | Urea<br>$\text{CO}(\text{NH}_2)_2$<br>(Sigma<br>Aldrich)<br><br>(g) | Gadolinium nitrate<br>$-\text{Gd}(\text{NO}_3)_3 \times 6\text{H}_2\text{O}$ ,<br>(Sigma<br>Aldrich)<br><br>(g) | Erbium<br>nitrate -<br>$\text{Er}(\text{NO}_3)_3$<br>$\times 6\text{H}_2\text{O}$ ,<br>(Sigma<br>Aldrich)<br><br>(g) | Ytterbium<br>nitrate -<br>$\text{Yb}(\text{NO}_3)_3$<br>$\times 6\text{H}_2\text{O}$ ,<br>(Sigma<br>Aldrich)<br><br>(g) | Zinc<br>nitrate -<br>$\text{Zn}(\text{NO}_3)_2 \times 6\text{H}_2\text{O}$ ,<br>(Chempur)<br><br>(g) |
| 0                                                                                                                                                                                                       | 4.76                                                                | 4.9                                                                                                             | 0.026                                                                                                                | 0.48                                                                                                                    | -                                                                                                    |
| 2.5                                                                                                                                                                                                     | 4.91                                                                | 4.9                                                                                                             | 0.026                                                                                                                | 0.48                                                                                                                    | 0.09                                                                                                 |
| 5                                                                                                                                                                                                       | 5.03                                                                | 4.9                                                                                                             | 0.026                                                                                                                | 0.48                                                                                                                    | 0.18                                                                                                 |
| 20                                                                                                                                                                                                      | 5.75                                                                | 4.9                                                                                                             | 0.026                                                                                                                | 0.48                                                                                                                    | 0.71                                                                                                 |
| 25                                                                                                                                                                                                      | 5.99                                                                | 4.9                                                                                                             | 0.026                                                                                                                | 0.48                                                                                                                    | 0.89                                                                                                 |
| 50                                                                                                                                                                                                      | 7.19                                                                | 4.9                                                                                                             | 0.026                                                                                                                | 0.48                                                                                                                    | 1.78                                                                                                 |

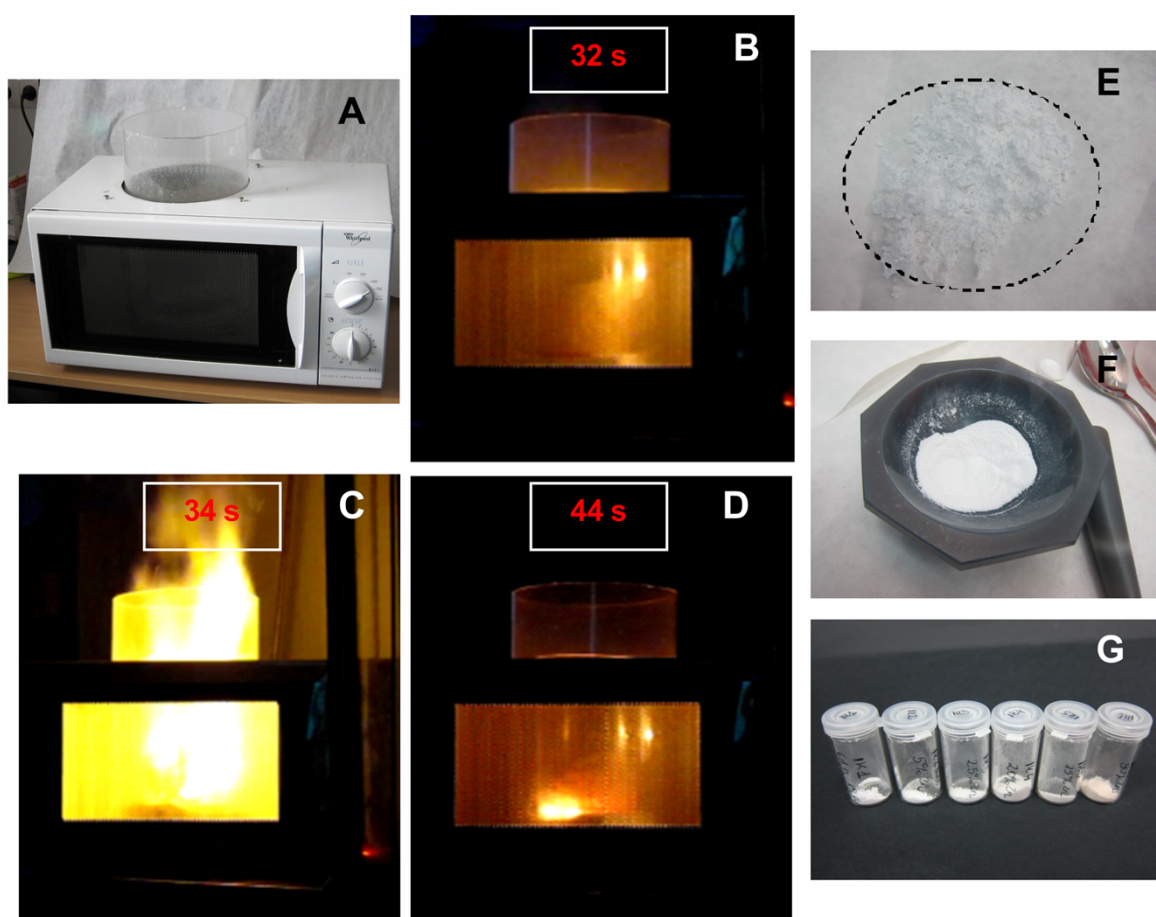

**Fig. S1** A) Microwave oven used for high-temperature synthesis of  $\text{Gd}_2\text{O}_3$  NPs doped with  $\text{Er}^{3+}$ ,  $\text{Yb}^{3+}$  and  $\text{Zn}^{2+}$ . Combustion synthesis procedure in a microwave oven over time: B) 32 s C) 34 s D) 44 s. E) Fluffy mass directly received after synthesis. F) The nanoparticles milled in an agate mortar. G) The resulting NPs samples.

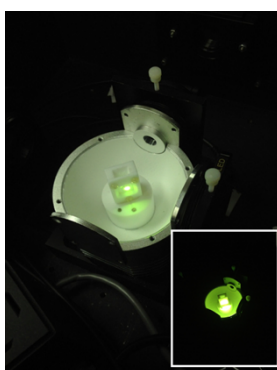

**Fig. S2** Photos of the integrating sphere with illuminated sample by the 980 nm laser.

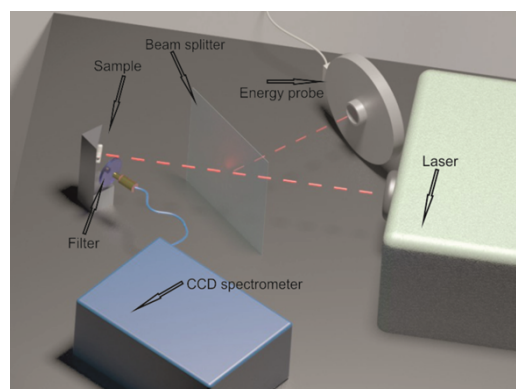

**Fig. S3** Scheme of the experimental setup used for excitation-emission NPs measurements.

### 1.13 Reproducibility testing of $\text{Gd}_2\text{O}_3$ : 1% $\text{Er}^{3+}$ , 18% $\text{Yb}^{3+}$ and $\text{Gd}_2\text{O}_3$ : 1% $\text{Er}^{3+}$ , 18% $\text{Yb}^{3+}$ , 5% $\text{Zn}^{2+}$ nanoparticles

In the Institute of Physics PAS (IP PAS) we examined cell parameter of  $\text{Gd}_2\text{O}_3$ :  $\text{Er}^{3+}$ ,  $\text{Yb}^{3+}$  nanoparticles for 1 and 2 samples. Whereas measurements at the third sample was carried out at the Institute of Ceramics and Building Materials (ICBM) (Fig. S4). The samples were investigated using a Philips X'Pert Pro Alpha1 MPD diffractometer (Panalytical) ( $\lambda = 1.5406 \text{ \AA}$ ) (IP PAS) and X-ray diffractometer D8 DISCOVER (ICBM).

In the first case, in order to examine the structural parameters of the samples, Rietveld refinement was performed. In the case of the 3 samples measured in the ICBM, we determined structural parameters using Pawley refinement, after earlier determination of widening reflections and the other constant parameters of X-ray beam, on the pattern NIST number 660b ( $\text{LaB}_6$ ).

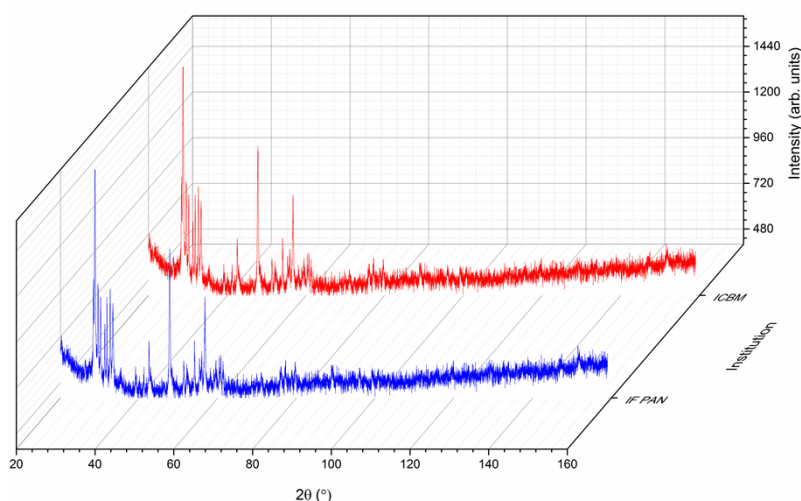

**Fig. S4** Diffractograms obtained for the two samples  $\text{Gd}_2\text{O}_3$ :  $\text{Er}^{3+}$ ,  $\text{Yb}^{3+}$  nanoparticles measured in the IP PAS and ICBM.

**Table S2.** Cell parameters obtained  $\text{Gd}_2\text{O}_3$ :  $\text{Er}^{3+}$ ,  $\text{Yb}^{3+}$  nanoparticles.

|                                | Sample 1                        | Sample 2                       | Sample 3              |
|--------------------------------|---------------------------------|--------------------------------|-----------------------|
| Phase                          | IF PAS                          | IF PAS                         | ICBM                  |
|                                | (Å)                             |                                |                       |
| $\text{Gd}_2\text{O}_3$ (C2/m) | $a = 14.07254 \pm 0.00030$      | $a = 14.06999 \pm 0.00028$     | $a = 14.1022(41)$     |
|                                | $b = 3.56318 \pm 0.00007$       | $b = 3.56038 \pm 0.00005$      | $b = 3.5529(16)$      |
|                                | $c = 8.74296 \pm 0.00021$       | $c = 8.73932 \pm 0.00020$      | $c = 8.74420(12)$     |
| $\text{Gd}_2\text{O}_3$ (Ia-3) | $\beta = 100.23065 \pm 0.00159$ | $\beta = 100.2439 \pm 0.00158$ | $\beta = 100.232(23)$ |
|                                | $a = 10.78165 \pm 0.00019$      | $a = 10.77445 \pm 0.00021$     | $a = 10.7797(12)$     |



The obtained lattice parameters from the XRD measurements have a similar values as demonstrated by the data collected in Table S2. Thus we can conclude that, as a results of the synthesis, we obtained repeatable samples.

The second experiment which we conducted in order to check whether our results are reproducible, was to determine emission spectra of  $\text{Gd}_2\text{O}_3$ : 1%  $\text{Er}^{3+}$ , 18% $\text{Yb}^{3+}$ , 5%  $\text{Zn}^{2+}$  nanoparticles, in the visible region, by 980 nm excitation. The measurements were performed on 3 samples, under identical geometrical conditions of the optical system, and under identical values of the excitation power densities.

As shown on Fig. S5 the emission spectra of the three tested samples are reproducible. These nanoparticles exhibit luminescence at a maximum wavelength of 550 nm and 660 nm. As judged by the total areas under the emission spectra, for the three independent samples, the quantum yields are comparable Table S3.

Thus, based on the structural similarities (X-ray) of three zinc free samples and spectroscopic properties of Zn containing samples (emission), the synthesis methodology is reproducible.

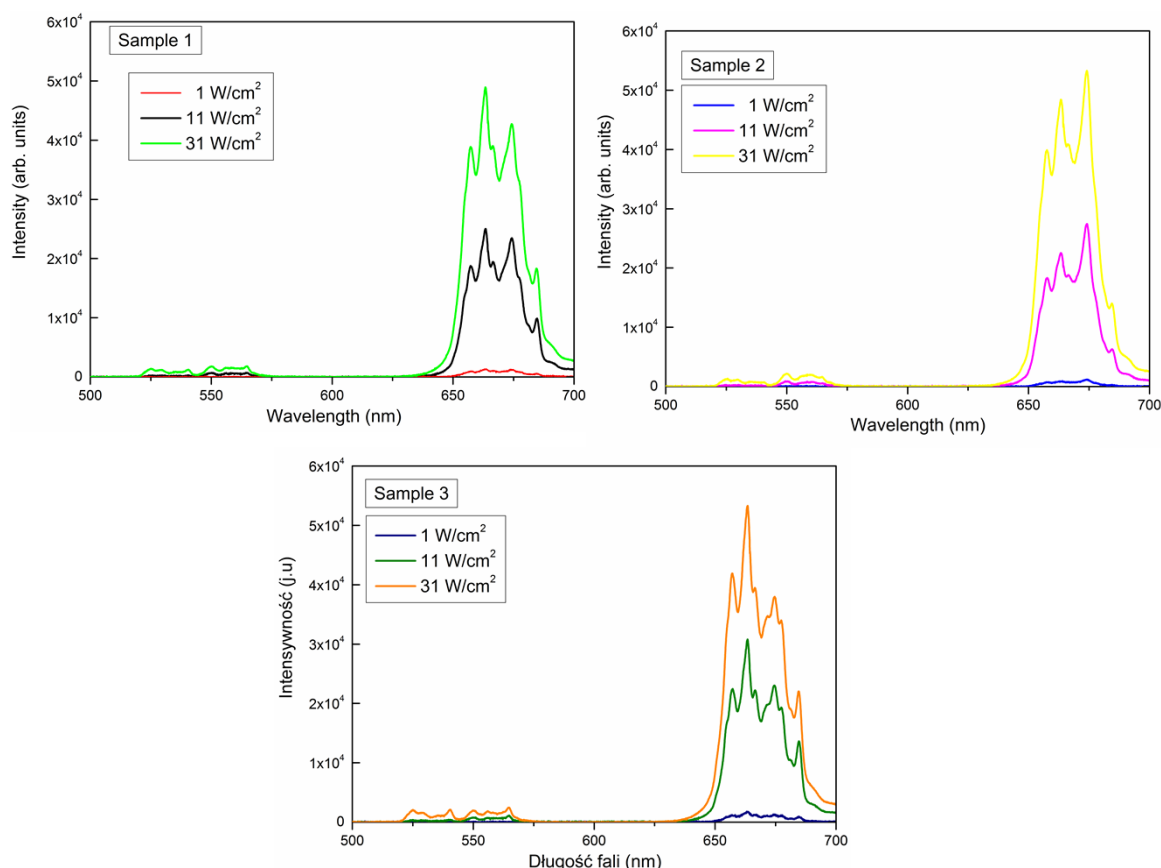

**Fig. S5.** Emission spectra of the three tested samples of  $\text{Gd}_2\text{O}_3$ : 1%  $\text{Er}^{3+}$ , 18% $\text{Yb}^{3+}$ , 5%  $\text{Zn}^{2+}$  nanoparticles measured at different a laser power densities of 980 nm.

**Table S3.** Relative number of photons emitted and obtained from Gd<sub>2</sub>O<sub>3</sub>: 1% Er<sup>3+</sup>, 18%Yb<sup>3+</sup>, 5% Zn<sup>2+</sup> nanoparticles.

| Power density (W/cm <sup>2</sup> ) | Relative number of photons (arb. units) |                  |                                      |                    |                  |                                      |                    |                  |                                      |                                                 |
|------------------------------------|-----------------------------------------|------------------|--------------------------------------|--------------------|------------------|--------------------------------------|--------------------|------------------|--------------------------------------|-------------------------------------------------|
|                                    | Sample 1                                |                  |                                      | Sample 2           |                  |                                      |                    | Sample 3         |                                      | Average<br>I <sub>red</sub> /I <sub>green</sub> |
|                                    | I <sub>green</sub>                      | I <sub>red</sub> | I <sub>red</sub> /I <sub>green</sub> | I <sub>green</sub> | I <sub>red</sub> | I <sub>red</sub> /I <sub>green</sub> | I <sub>green</sub> | I <sub>red</sub> | I <sub>red</sub> /I <sub>green</sub> |                                                 |
| 1                                  | -                                       | 30747            | -                                    | -                  | 22106            | -                                    | -                  | 36161            | -                                    | -                                               |
| 11                                 | 15355                                   | 590225           | 38                                   | 16740              | 577879           | 35                                   | 19455              | 676072           | 35                                   | 36,0<br>± 1,7                                   |
| 31                                 | 52769                                   | 1205207          | 23                                   | 54668              | 1251759          | 23                                   | 55883              | 1232949          | 22                                   | 22,6 ±<br>0,3                                   |

### 1.14 Safety statement with the description of the microwave

All experiments involving the microwave-induced solution combustion synthesis were performed maintaining required safety standards.

We used a modified Whirlpool Microwave Model AVM/401/1/WH. The modification consisted of cutting out a hole in the upper wall in order to discharge gases produced during the synthesis (Fig. S6a). The chimney made of quartz glass was inserted through the hole (Fig. S6a). Microwave were controlled by additional control panel placed at a distance of about 5 m from the device (Fig. S6b).

In addition, a stainless steel mesh cap (Fig. S7a) was placed above the hole. The device was placed inside a chemical fume hood (Picture S6c). In addition, to limit the level of microwave radiation escape, a “cage” made of copper mesh (1 mm mesh diameter) attached to the hood was constructed (Fig. S6c, Fig. S7b). The level of radiation was investigated using a Microwave Leakage Detector and determined to be less than 0.1 mW/cm<sup>2</sup> at a distance of 5 meters from the device.

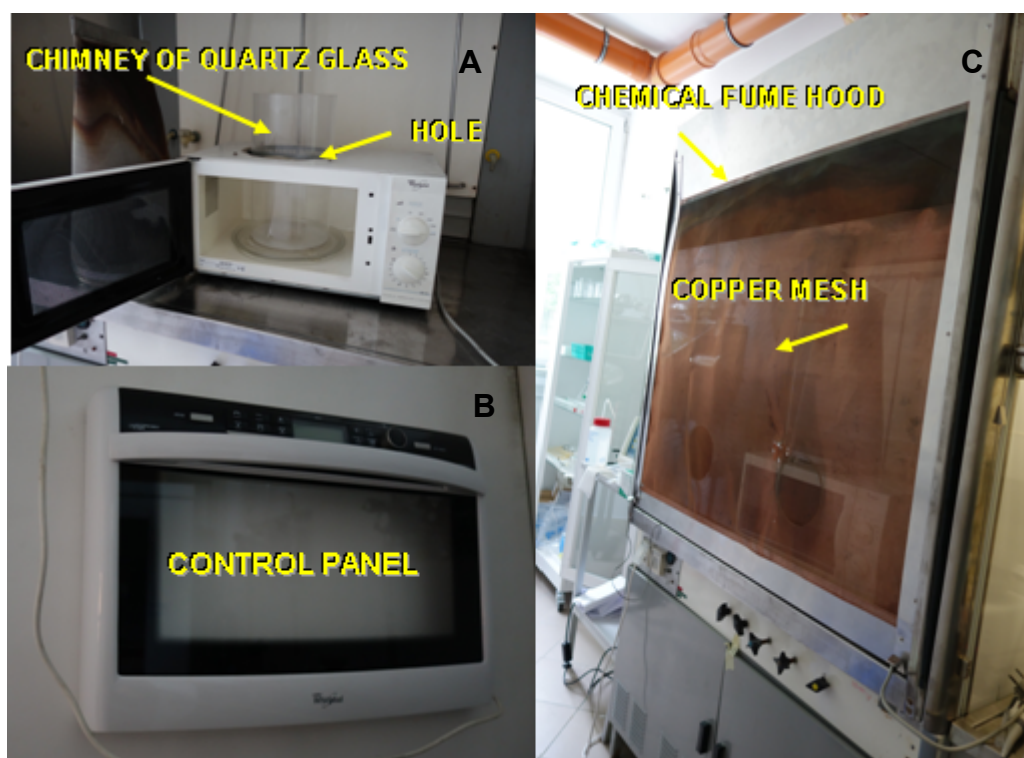

**Fig. S6.** A) A modified Whirlpool Microwave Model AVM/401/1/WH. B) The control panel. C) A chemical fume hood with a “cage” made of copper mesh.

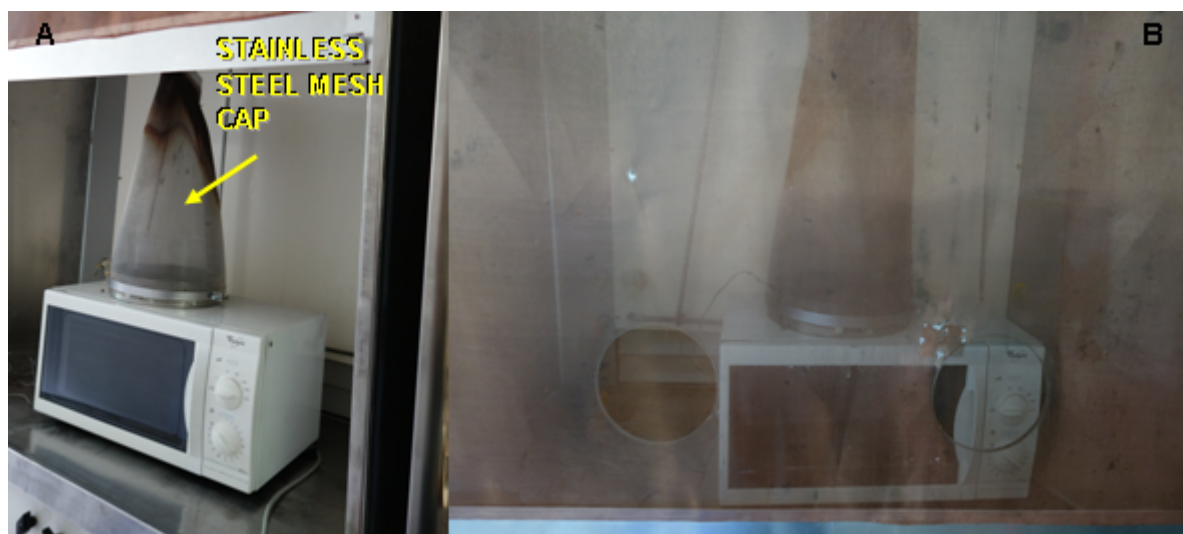

**Fig. S7.** A) A stainless steel mesh cap and B) view of valve a chemical fume hood in front.

**Table S4.** Parameter of the crystal lattice.

| Phase Gd <sub>2</sub> O <sub>3</sub> : 1% Er <sup>3+</sup> , 18% Yb <sup>3+</sup> , x% Zn <sup>2+</sup> |            |           |           |             |         |            |         |                 |           |        |
|---------------------------------------------------------------------------------------------------------|------------|-----------|-----------|-------------|---------|------------|---------|-----------------|-----------|--------|
| x% Zn <sup>2+</sup><br>(non-calcined)                                                                   | Monoclinic |           |           |             |         | Cubic      |         | ZnO (hexagonal) |           |        |
|                                                                                                         | a(Å)       | b(Å)      | c(Å)      | β           | %       | a(Å)       | %       | a(Å)            | c(Å)      | %      |
| 0                                                                                                       | 14.07254 ± | 3.56318 ± | 8.74296 ± | 100.23065 ± | 60.16 ± | 10.78165 ± | 39.84 ± | -               | -         | -      |
|                                                                                                         | 0.00030    | 0.00007   | 0.00021   | 0.00159     | 0.45    | 0.00019    | 0.35    | -               | -         | -      |
| 2.5                                                                                                     | 14.07006 ± | 3.56142 ± | 8.74077 ± | 100.19921 ± | 64.22 ± | 10.77948 ± | 35.78 ± | -               | -         | -      |
|                                                                                                         | 0.00025    | 0.00006   | 0.00017   | 0.00128     | 0.35    | 0.00014    | 0.24    | -               | -         | -      |
| 5                                                                                                       | 14.06794 ± | 3.56097 ± | 8.73979 ± | 100.20696 ± | 53.48 ± | 10.77814 ± | 46.52 ± | -               | -         | -      |
|                                                                                                         | 0.00024    | 0.00006   | 0.00016   | 0.00112     | 1.74    | 0.00015    | 1.63    | -               | -         | -      |
| 20                                                                                                      | 14.06979 ± | 3.56096 ± | 8.74054 ± | 100.20031 ± | 81.19 ± | 10.77839 ± | 18.81 ± | -               | -         | -      |
|                                                                                                         | 0.00027    | 0.00007   | 0.00019   | 0.00125     | 0.52    | 0.00024    | 0.27    | -               | -         | -      |
| 25                                                                                                      | 14.06915 ± | 3.56074 ± | 8.73994 ± | 100.22092 ± | 80.56 ± | 10.77704 ± | 19.44 ± | -               | -         | -      |
|                                                                                                         | 0.00031    | 0.00007   | 0.00021   | 0.00137     | 0.55    | 0.00026    | 0.27    | -               | -         | -      |
| 50                                                                                                      | 14.07286 ± | 3.56147 ± | 8.74185 ± | 100.23469 ± | 66.34 ± | 10.77936 ± | 24.15 ± | 3.25001 ±       | 5.20434 ± | 9.51 ± |
|                                                                                                         | 0.00045    | 0.00010   | 0.00030   | 0.00202     | 0.67    | 0.00032    | 0.40    | 0.00021         | 0.00055   | 0.22   |
| x% Zn <sup>2+</sup><br>(calcined)                                                                       | Monoclinic |           |           |             |         | Cubic      |         | ZnO hexagonal   |           |        |
|                                                                                                         | a(Å)       | b(Å)      | c(Å)      | β           | %       | a(Å)       | %       | a(Å)            | c(Å)      | %      |
| 0                                                                                                       | 14.07063 ± | 3.56143 ± | 8.74109 ± | 100.22256 ± | 26.91 ± | 10.77750 ± | 73.09 ± | -               | -         | -      |
|                                                                                                         | 0.00054    | 0.00013   | 0.00039   | 0.00346     | 0.59    | 0.00011    | 0.59    | -               | -         | -      |
| 2.5                                                                                                     | 14.07226 ± | 3.56165 ± | 8.74176 ± | 100.21375 ± | 41.99 ± | 10.78053 ± | 58.01 ± | -               | -         | -      |
|                                                                                                         | 0.00082    | 0.00021   | 0.00055   | 0.00288     | 0.69    | 0.00037    | 0.66    | -               | -         | -      |
| 5                                                                                                       | 14.07476 ± | 3.56124 ± | 8.74202 ± | 100.23383 ± | 42.96 ± | 10.77890 ± | 57.04 ± | -               | -         | -      |
|                                                                                                         | 0.00073    | 0.00019   | 0.00049   | 0.00269     | 0.64    | 0.00039    | 0.58    | -               | -         | -      |
| 20                                                                                                      | 14.07621 ± | 3.56089 ± | 8.74247 ± | 100.25504 ± | 43.47 ± | 10.77959 ± | 55.49 ± | 3.25127 ±       | 5.20284 ± | 1.04 ± |
|                                                                                                         | 0.00036    | 0.00009   | 0.00024   | 0.00134     | 0.33    | 0.00020    | 0.30    | 0.00007         | 0.00018   | 0.07   |
| 25                                                                                                      | 14.07885 ± | 3.56079 ± | 8.74279 ± | 100.27840 ± | 65.70 ± | 10.77883 ± | 32.75 ± | 3.25057 ±       | 5.20590 ± | 1.55 ± |
|                                                                                                         | 0.0002     | 0.00005   | 0.00013   | 0.00087     | 0.36    | 0.00009    | 0.20    | 0.00005         | 0.00013   | 0.09   |
| 50                                                                                                      | 14.07754 ± | 3.56083 ± | 8.74286 ± | 100.26948 ± | 29.94 ± | 10.77883 ± | 65.13 ± | 3.25062 ±       | 5.20318 ± | 4.93 ± |
|                                                                                                         | 0.00071    | 0.00018   | 0.00049   | 0.00370     | 0.62    | 0.00029    | 0.67    | 0.00005         | 0.00012   | 0.15   |

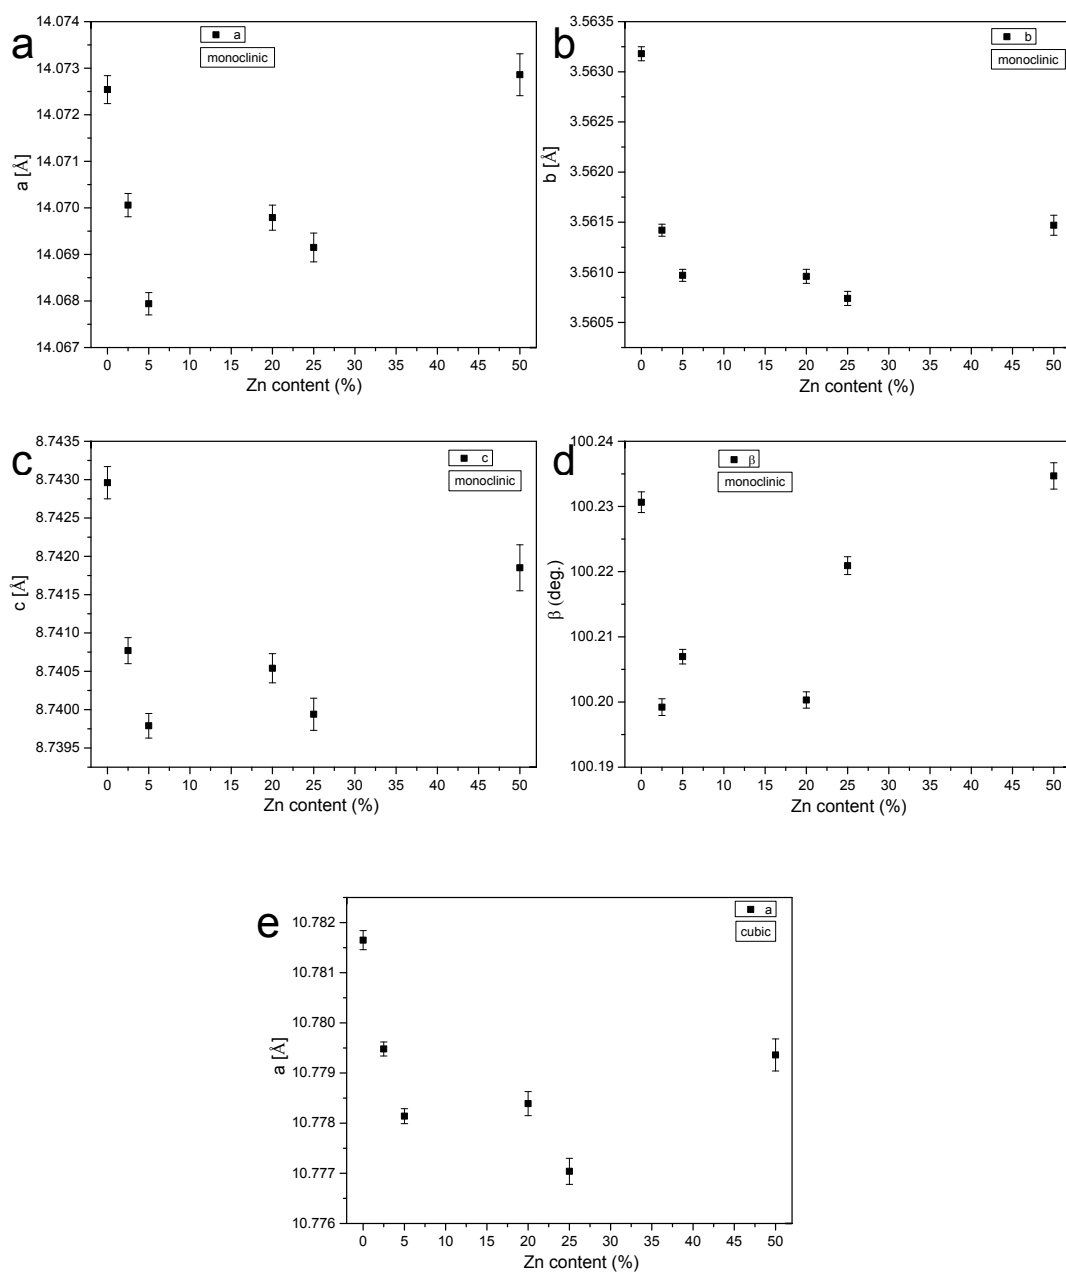

**Fig. S8** Unit cell lattice constant of the  $\text{Gd}_2\text{O}_3$  nanoparticles doped 1%  $\text{Er}^{3+}$ , 18%  $\text{Yb}^{3+}$  with different input  $\text{Zn}^{2+}$  content (A, B, C, D) monoclinic phase and E) cubic phase.

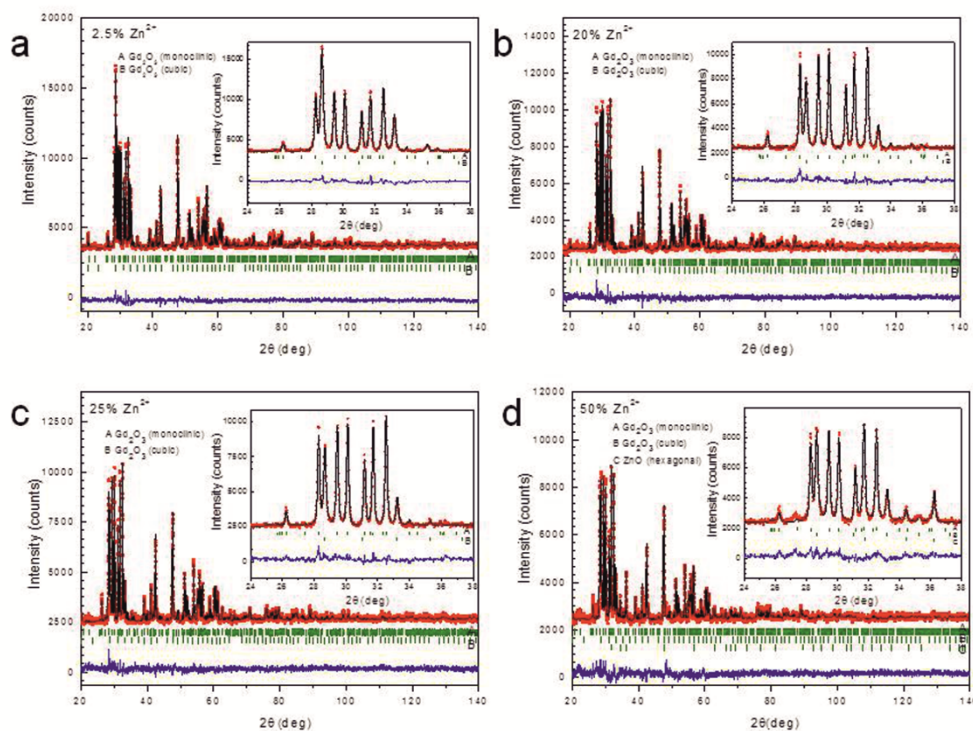

**Fig. S9** Refinement of non-calcined NPs with various input concentrations of  $\text{Zn}^{2+}$  A) 2.5% B) 20% C) 25% and D) 50% by the Rietveld method. Symbols: experimental diffractogram (red points), theoretical (black line), differential curve (blue line), positions of Bragg reflection (green symbol).

## Transmission Electron Microscopy

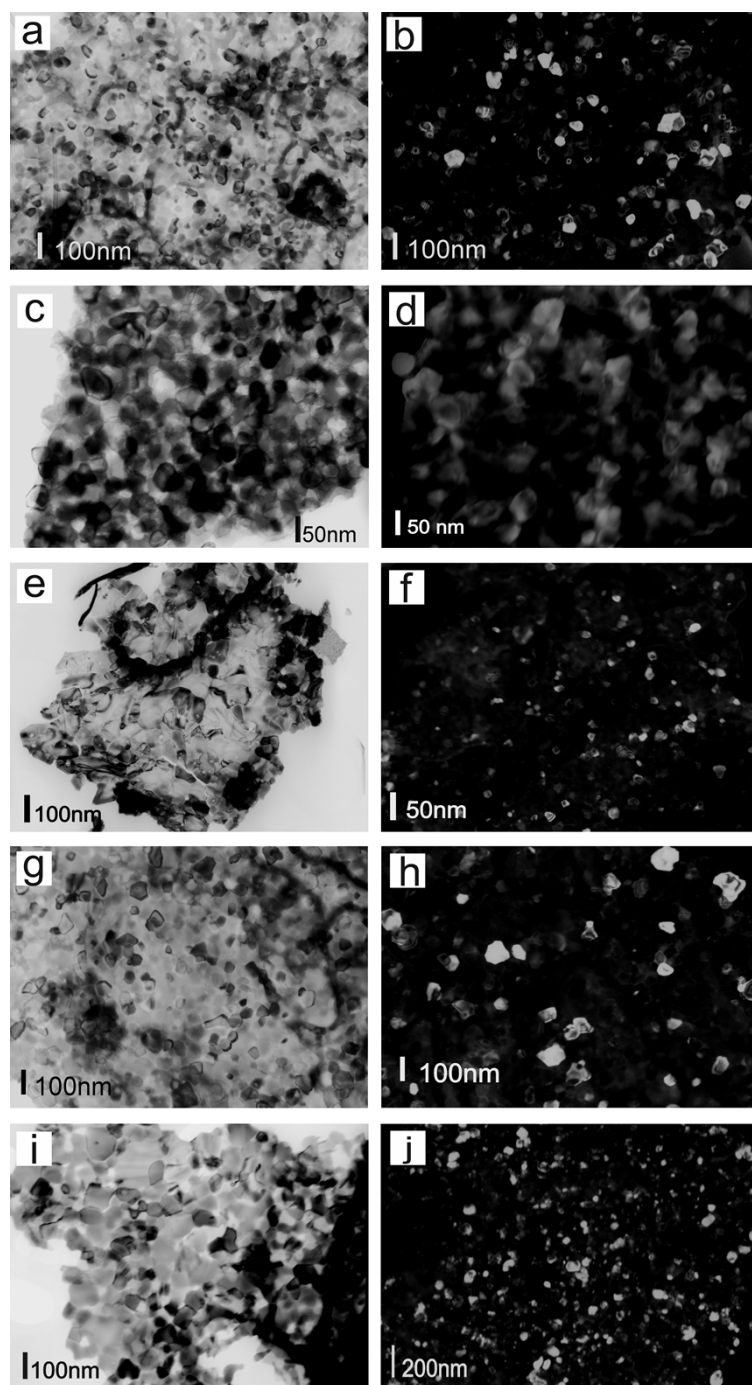

**Fig. S10** TEM bright and dark field images of NPs doped with different input concentration of Zn<sup>2+</sup> ions : (A, B) 2.5% (C, D) 5% (E, F) 20% (G, H) 25% (I, J) 50%.



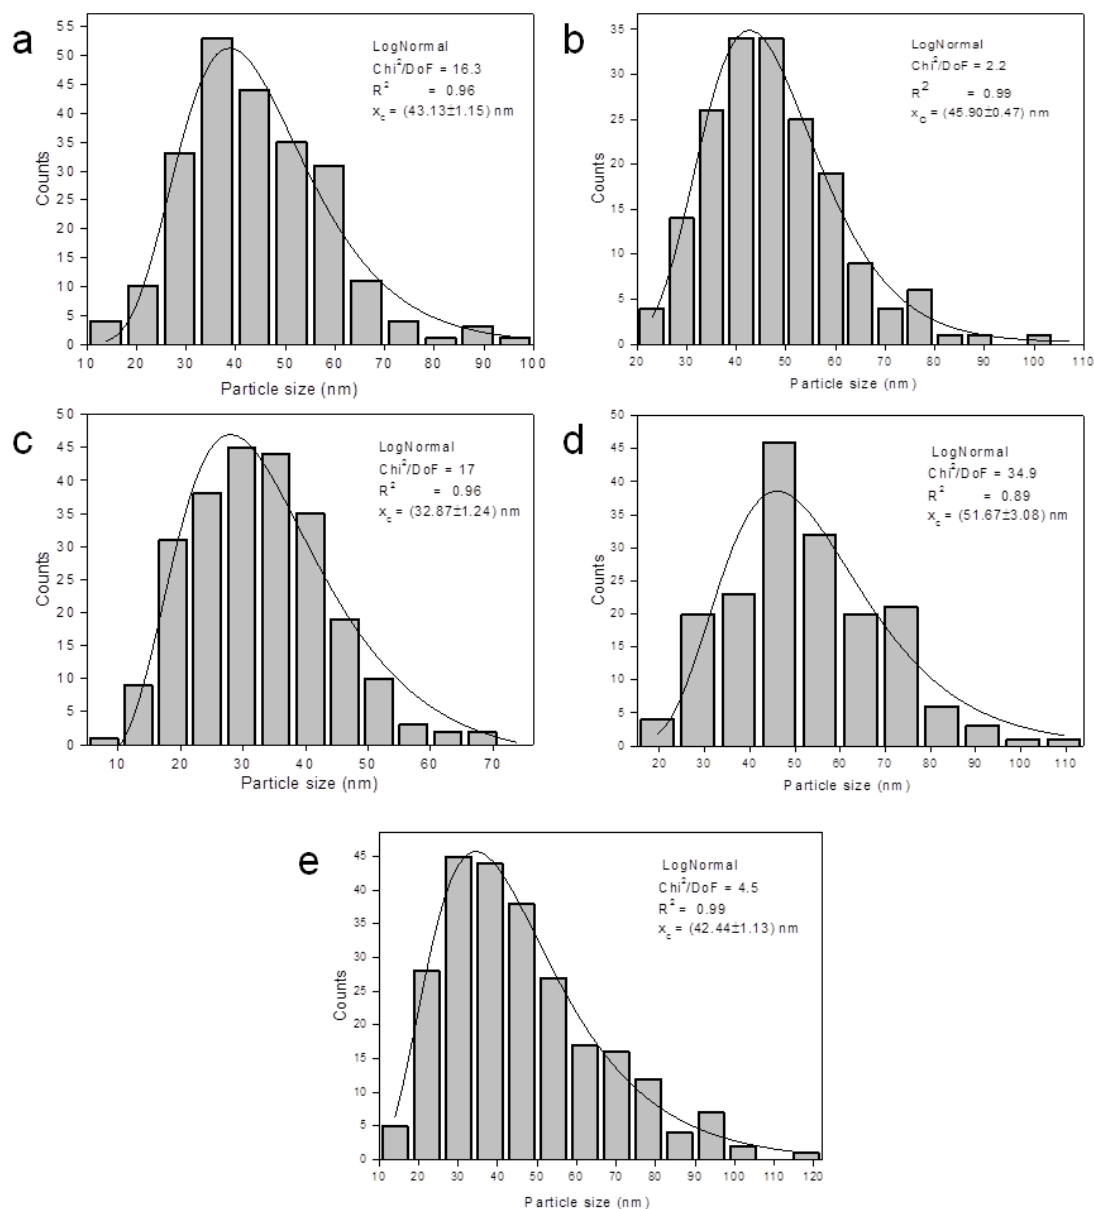

**Fig. S11** Size distribution of NPs doped for different concentration of  $\text{Zn}^{2+}$  (the content of  $\text{Zn}^{2+}$  in relation to the amount of  $\text{Gd}^{3+}$  in the starting material): A) 2.5%, B) 5%, C) 20%, D) 25%, E) 50%.

**Table S5.** Quantum yields obtained at several different laser powers and sizes of Gd<sub>2</sub>O<sub>3</sub>: 1% Er<sup>3+</sup>, 18% Yb<sup>3+</sup> NPs, for different zinc concentrations (non-calcined samples).

| The content of Zn <sup>2+</sup> in relation to the amount of Gd <sup>3+</sup> in the starting material | TEM particle size (nm) | XRD crystallite size (nm) | QY (%) | Laser Power (mW) |
|--------------------------------------------------------------------------------------------------------|------------------------|---------------------------|--------|------------------|
| Without Zn <sup>2+</sup>                                                                               | -                      | ~91                       | 0.0235 | 597.7            |
|                                                                                                        |                        |                           | 0.0216 | 289.7            |
|                                                                                                        |                        |                           | 0.0188 | 207.4            |
|                                                                                                        |                        |                           | 0.0152 | 188              |
|                                                                                                        |                        |                           | 0.0082 | 68.3             |
|                                                                                                        |                        |                           | 0.0054 | 58.3             |
|                                                                                                        |                        |                           | 0.0041 | 42               |
|                                                                                                        |                        |                           | 0.0035 | 37.6             |
|                                                                                                        |                        |                           | 0.0014 | 20.5             |
|                                                                                                        |                        |                           | 0.0004 | 14.7             |
| 2.5                                                                                                    | ~43                    | ~76                       | 0.0590 | 597.7            |
|                                                                                                        |                        |                           | 0.0320 | 289.7            |
|                                                                                                        |                        |                           | 0.0250 | 207.4            |
|                                                                                                        |                        |                           | 0.0120 | 68.3             |
|                                                                                                        |                        |                           | 0.0100 | 58.3             |
|                                                                                                        |                        |                           | 0.0050 | 42               |
|                                                                                                        |                        |                           | 0.0040 | 37.6             |
|                                                                                                        |                        |                           | 0.0020 | 20.5             |
|                                                                                                        |                        |                           | 0.0010 | 14.7             |
| 5                                                                                                      | ~46                    | ~67                       | 0.0890 | 597.7            |
|                                                                                                        |                        |                           | 0.0210 | 289.7            |
|                                                                                                        |                        |                           | 0.0160 | 207.4            |
|                                                                                                        |                        |                           | 0.0080 | 68.3             |
|                                                                                                        |                        |                           | 0.0060 | 58.3             |
|                                                                                                        |                        |                           | 0.0030 | 42               |
|                                                                                                        |                        |                           | 0.0030 | 37.6             |
|                                                                                                        |                        |                           | 0.0010 | 20.5             |
| 20                                                                                                     | ~33                    | ~80                       | 0.0238 | 597.7            |
|                                                                                                        |                        |                           | 0.0132 | 289.7            |
|                                                                                                        |                        |                           | 0.0091 | 207.4            |
|                                                                                                        |                        |                           | 0.0056 | 68.3             |
|                                                                                                        |                        |                           | 0.0040 | 58.3             |
|                                                                                                        |                        |                           | 0.0025 | 42               |
|                                                                                                        |                        |                           | 0.0020 | 37.6             |
|                                                                                                        |                        |                           | 0.0006 | 20.5             |
|                                                                                                        |                        |                           | 0.0002 | 14.7             |
| 25                                                                                                     | ~52                    | ~77                       | 0.0170 | 597.7            |
|                                                                                                        |                        |                           | 0.0102 | 289.7            |
|                                                                                                        |                        |                           | 0.0087 | 207.4            |
|                                                                                                        |                        |                           | 0.0047 | 68.3             |
|                                                                                                        |                        |                           | 0.0040 | 58.3             |
|                                                                                                        |                        |                           | 0.0020 | 42               |
|                                                                                                        |                        |                           | 0.0018 | 37.6             |
|                                                                                                        |                        |                           | 0.0006 | 20.5             |
|                                                                                                        |                        |                           | 0.0002 | 14.7             |
| 50                                                                                                     | ~43                    | ~67                       | 0.0024 | 597.7            |
|                                                                                                        |                        |                           | 0.0019 | 289.7            |
|                                                                                                        |                        |                           | 0.0016 | 207.4            |
|                                                                                                        |                        |                           | 0.0005 | 68.3             |
|                                                                                                        |                        |                           | 0.0004 | 58.3             |
|                                                                                                        |                        |                           | 0.0002 | 42               |

**Table S6.** Quantum yields obtained for several laser powers and sizes of Gd<sub>2</sub>O<sub>3</sub>: 1% Er<sup>3+</sup>, 18% Yb<sup>3+</sup>, 5% Zn<sup>2+</sup> NPs, for different NaCl content.

| Sample<br>Gd <sub>2</sub> O <sub>3</sub> :<br>1%Er <sup>3+</sup> ,18%Yb <sup>3+</sup> ,<br>5% Zn <sup>2+</sup><br>NaCl concentration<br>(mM) | XRD crystallite size<br>(nm) | QY (%) | Laser Power<br>(mW) |
|----------------------------------------------------------------------------------------------------------------------------------------------|------------------------------|--------|---------------------|
| 11                                                                                                                                           | ~81                          | 0.0024 | 597.7               |
|                                                                                                                                              |                              | 0.0010 | 289.7               |
|                                                                                                                                              |                              | 0.0007 | 207.4               |
|                                                                                                                                              |                              | 0.0007 | 68.3                |
|                                                                                                                                              |                              | 0.0003 | 58.3                |
|                                                                                                                                              |                              | 0.0001 | 42                  |
| 8                                                                                                                                            | ~78                          | 0.0029 | 597.7               |
|                                                                                                                                              |                              | 0.0011 | 289.7               |
|                                                                                                                                              |                              | 0.0009 | 207.4               |
|                                                                                                                                              |                              | 0.0008 | 68.3                |
|                                                                                                                                              |                              | 0.0003 | 58.3                |
|                                                                                                                                              |                              | 0.0001 | 42                  |
| 6                                                                                                                                            | ~75                          | 0.0032 | 597.7               |
|                                                                                                                                              |                              | 0.0017 | 289.7               |
|                                                                                                                                              |                              | 0.0011 | 207.4               |
|                                                                                                                                              |                              | 0.0011 | 68.3                |
|                                                                                                                                              |                              | 0.0004 | 58.3                |
|                                                                                                                                              |                              | 0.0002 | 42                  |
| 3                                                                                                                                            | ~67                          | 0.0044 | 597.7               |
|                                                                                                                                              |                              | 0.0018 | 289.7               |
|                                                                                                                                              |                              | 0.0014 | 207.4               |
|                                                                                                                                              |                              | 0.0013 | 68.3                |
|                                                                                                                                              |                              | 0.0005 | 58.3                |
|                                                                                                                                              |                              | 0.0002 | 42                  |

**Table S7.**

| <b>Gd<sub>2</sub>O<sub>3</sub>:1% Er<sup>3+</sup>, 18% Yb<sup>3+</sup>, x% Zn<sup>2+</sup><br/>(non-calcined samples)</b>       |                                                                             |                                           |
|---------------------------------------------------------------------------------------------------------------------------------|-----------------------------------------------------------------------------|-------------------------------------------|
|                                                                                                                                 | <b>Red emission<br/>( 630-700 nm)</b>                                       | <b>Green emission<br/>( 510 - 585 nm)</b> |
| <b>The content of Zn<sup>2+</sup> in<br/>relation to the amount<br/>of Gd<sup>3+</sup> in the starting<br/>material<br/>(%)</b> | <b>Number of photons absorbed<br/>per up-converted photon emitted<br/>n</b> |                                           |
| 0                                                                                                                               | 2.30                                                                        | no luminescence                           |
| 2.5                                                                                                                             | 2.21                                                                        | 1.57                                      |
| 5                                                                                                                               | 2.00                                                                        | 1.98                                      |
| 20                                                                                                                              | 1.88                                                                        | 1.94                                      |
| 25                                                                                                                              | 2.16                                                                        | (1) 0.56<br>(2) 2.47                      |
| 50                                                                                                                              | 2.17                                                                        | (1) 1.82<br>(2) 1.54                      |

**Table S6.**

| <b>Gd<sub>2</sub>O<sub>3</sub>:1% Er<sup>3+</sup>, 18% Yb<sup>3+</sup>, x% Zn<sup>2+</sup><br/>(calcined samples (2 h- 900 °C))</b> |                                                                             |                                           |
|-------------------------------------------------------------------------------------------------------------------------------------|-----------------------------------------------------------------------------|-------------------------------------------|
|                                                                                                                                     | <b>Red emission<br/>( 630-700 nm)</b>                                       | <b>Green emission<br/>( 510 - 585 nm)</b> |
| <b>The content of Zn<sup>2+</sup> in<br/>relation to the amount<br/>of Gd<sup>3+</sup> in the starting<br/>material<br/>(%)</b>     | <b>Number of photons absorbed<br/>per up-converted photon emitted<br/>n</b> |                                           |
| 0                                                                                                                                   | 1.68                                                                        | 1.73                                      |
| 2.5                                                                                                                                 | 1.95                                                                        | 1.35                                      |
| 5                                                                                                                                   | 1.96                                                                        | 1.69                                      |
| 20                                                                                                                                  | 1.80                                                                        | 1.63                                      |
| 25                                                                                                                                  | 1.98                                                                        | 1.62                                      |
| 50                                                                                                                                  | 2.13                                                                        | (1) 1.96<br>(2) 0.92                      |

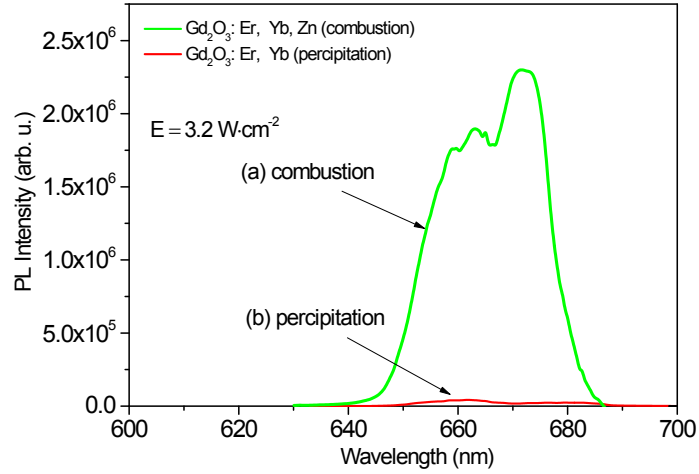

**Fig. S12** Comparison of upconversion PL of  $\text{Gd}_2\text{O}_3:\text{Er}^{3+}, \text{Yb}^{3+}, \text{Zn}^{2+}$  NPs obtained by the microwave-induced solution combustion synthesis A) and the  $\text{Gd}_2\text{O}_3:\text{Er}^{3+}, \text{Yb}^{3+}$  NPs synthesized by the homogenous precipitation method B) and calcined at  $900^\circ\text{C}$  in air by 3 h. Excitation by continues wave 980 nm laser.

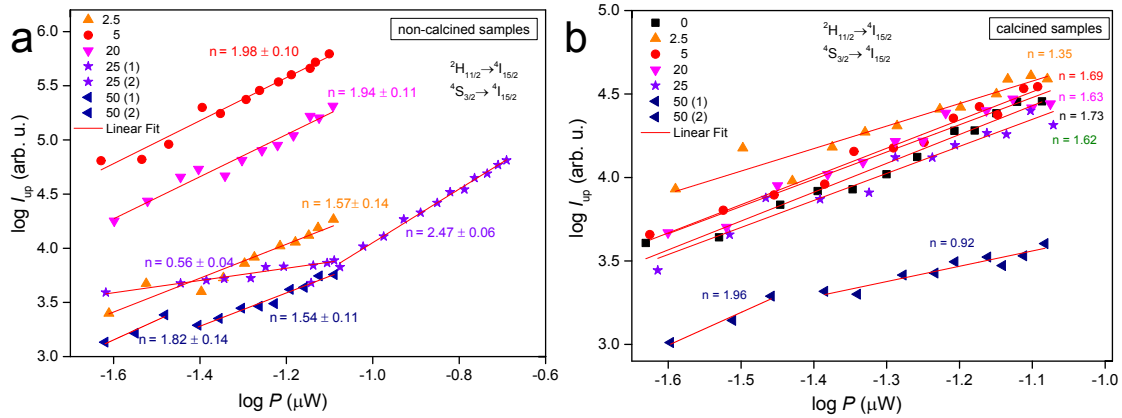

**Fig. S13** Double logarithmic plots of the intensity dependencies of the up-converted fluorescence as a function of the excitation power at 980 nm (cw) for different samples A) green luminescence (non-calcined) and B) calcined samples.  $n$  is integer of photons absorbed in the upconversion emission process.

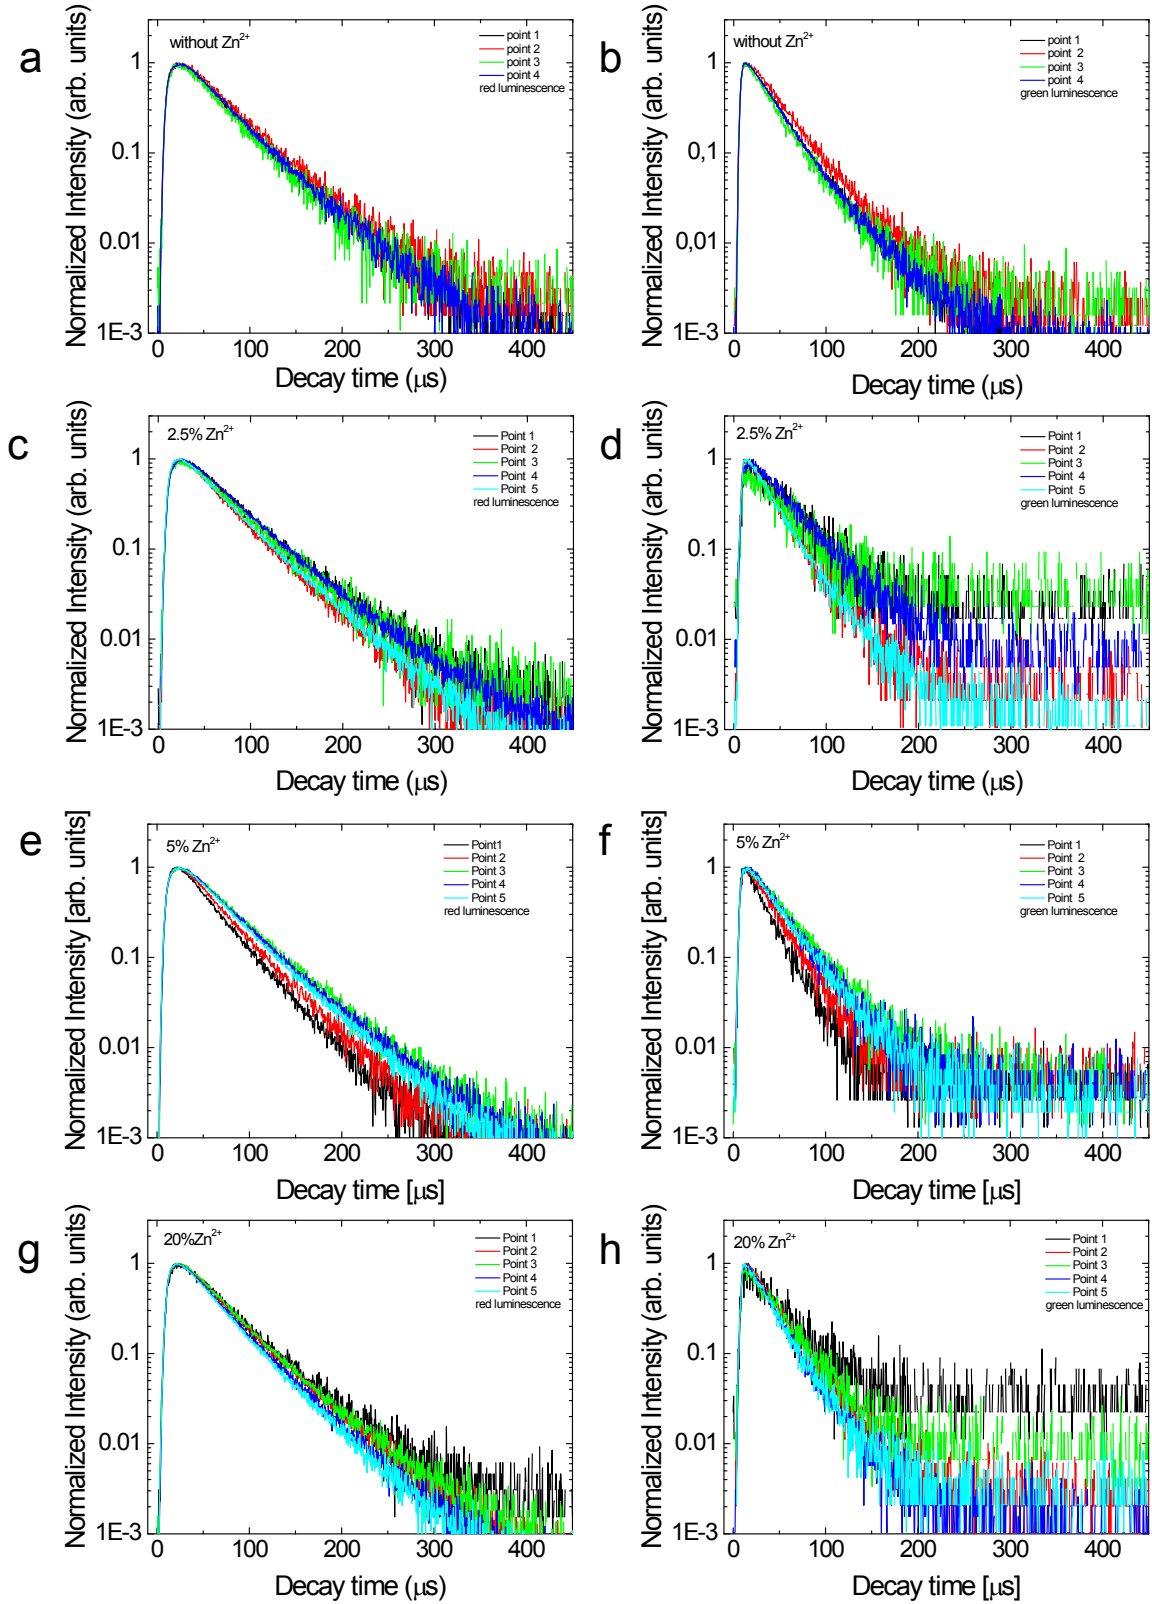

**Fig. S14** Luminescence decay curves of  $\text{Er}^{3+}$  at 980 nm laser pulse for the  $\lambda_{\text{em.}} = 550 \text{ nm}$  and  $\lambda_{\text{em.}} = 660 \text{ nm}$  at various input content of  $\text{Zn}^{2+}$  in (A, B) 0% (C, D) 2.5% (E, F) 5% (G, H) 20%.

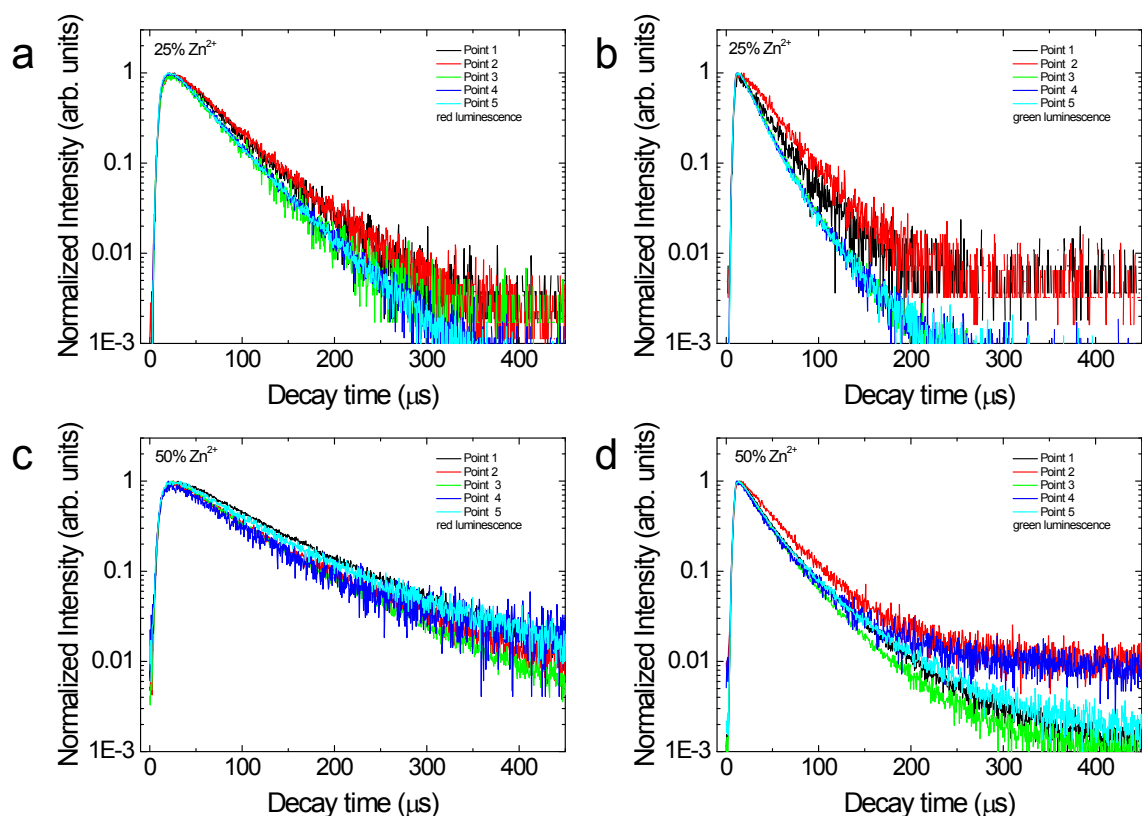

**Fig. S15** Luminescence decay curves of  $\text{Er}^{3+}$  at 980 nm laser pulse for the  $\lambda_{\text{emission}} = 550 \text{ nm}$  and  $\lambda_{\text{emission}} = 660 \text{ nm}$  at various input content of  $\text{Zn}^{2+}$  in (A, B) 25% (C, D) 50%.

**Table S9.** Summary of the luminescence decay of sample without  $\text{Zn}^{2+}$  for the specific transitions  $^4\text{S}_{3/2} \rightarrow ^4\text{I}_{15/2}$  (green emissions) and  $^4\text{F}_{9/2} \rightarrow ^4\text{I}_{15/2}$  (red emissions).

| The content of $\text{Zn}^{2+}$ in relation to the amount of $\text{Gd}^{3+}$ in the starting material | Green luminescence lifetime ( $\mu\text{s}$ ) ( $^4\text{S}_{3/2} \rightarrow ^4\text{I}_{15/2}$ , 550 nm) | Red luminescence lifetime ( $\mu\text{s}$ ) ( $^4\text{F}_{9/2} \rightarrow ^4\text{I}_{15/2}$ , 660 nm) |
|--------------------------------------------------------------------------------------------------------|------------------------------------------------------------------------------------------------------------|----------------------------------------------------------------------------------------------------------|
| <b>0%</b>                                                                                              |                                                                                                            |                                                                                                          |
| 1                                                                                                      | $29.83 \pm 0.10$                                                                                           | $45.45 \pm 0.39$                                                                                         |
| 2                                                                                                      | $35.01 \pm 0.24$                                                                                           | $49.07 \pm 0.52$                                                                                         |
| 3                                                                                                      | $27.52 \pm 0.17$                                                                                           | $42.92 \pm 0.35$                                                                                         |
| 4                                                                                                      | $29.87 \pm 0.11$                                                                                           | $49.45 \pm 0.54$                                                                                         |

**Table S10.** Summary of the luminescence decay of sample with 2.5% Zn<sup>2+</sup> for the specific transitions  $^4S_{3/2} \rightarrow ^4I_{15/2}$  (green emissions) and  $^4F_{9/2} \rightarrow ^4I_{15/2}$  (red emissions).

| The content of Zn <sup>2+</sup> in relation to the amount of Gd <sup>3+</sup> in the starting material | Green luminescence lifetime (μs)<br>( $^4S_{3/2} \rightarrow ^4I_{15/2}$ , 550 nm) | Red luminescence lifetime (μs)<br>( $^4F_{9/2} \rightarrow ^4I_{15/2}$ , 660 nm) |
|--------------------------------------------------------------------------------------------------------|------------------------------------------------------------------------------------|----------------------------------------------------------------------------------|
| <b>2.5%</b>                                                                                            |                                                                                    |                                                                                  |
| 1                                                                                                      | 44.14 ± 0.91                                                                       | 50.00 ± 0.30                                                                     |
| 2                                                                                                      | 30.37 ± 0.30                                                                       | 42.78 ± 0.19                                                                     |
| 3                                                                                                      | 47.41 ± 1.17                                                                       | 48.77 ± 0.31                                                                     |
| 4                                                                                                      | 39.43 ± 0.40                                                                       | 50.95 ± 0.28                                                                     |
| 5                                                                                                      | 27.13 ± 0.17                                                                       | 44.75 ± 0.19                                                                     |

**Table S11.** Summary of the luminescence decay of sample with 5% Zn<sup>2+</sup> for the specific transitions  $^4S_{3/2} \rightarrow ^4I_{15/2}$  (green emissions) and  $^4F_{9/2} \rightarrow ^4I_{15/2}$  (red emissions).

| The content of Zn <sup>2+</sup> in relation to the amount of Gd <sup>3+</sup> in the starting material | Green luminescence lifetime (μs)<br>( $^4S_{3/2} \rightarrow ^4I_{15/2}$ , 550 nm) | Red luminescence lifetime (μs)<br>( $^4F_{9/2} \rightarrow ^4I_{15/2}$ , 660 nm) |
|--------------------------------------------------------------------------------------------------------|------------------------------------------------------------------------------------|----------------------------------------------------------------------------------|
| <b>5%</b>                                                                                              |                                                                                    |                                                                                  |
| 1                                                                                                      | 22.08 ± 0.17                                                                       | 36.84 ± 0.16                                                                     |
| 2                                                                                                      | 28.81 ± 0.26                                                                       | 42.21 ± 0.25                                                                     |
| 3                                                                                                      | 39.71 ± 0.43                                                                       | 49.56 ± 0.24                                                                     |
| 4                                                                                                      | 32.70 ± 0.30                                                                       | 48.67 ± 0.27                                                                     |
| 5                                                                                                      | 32.11 ± 0.19                                                                       | 45.98 ± 0.20                                                                     |



**Table S12.** Summary of the luminescence decay of sample with 20% Zn<sup>2+</sup> for the specific transitions <sup>4</sup>S<sub>3/2</sub>→<sup>4</sup>I<sub>15/2</sub> (green emissions) and <sup>4</sup>F<sub>9/2</sub>→<sup>4</sup>I<sub>15/2</sub> (red emissions).

| The content of Zn <sup>2+</sup> in relation to the amount of Gd <sup>3+</sup> in the starting material | Green luminescence lifetime (μs)<br>( <sup>4</sup> S <sub>3/2</sub> → <sup>4</sup> I <sub>15/2</sub> , <b>550 nm</b> ) | Red luminescence lifetime (μs)<br>( <sup>4</sup> F <sub>9/2</sub> → <sup>4</sup> I <sub>15/2</sub> , <b>660 nm</b> ) |
|--------------------------------------------------------------------------------------------------------|------------------------------------------------------------------------------------------------------------------------|----------------------------------------------------------------------------------------------------------------------|
| <b>20%</b>                                                                                             |                                                                                                                        |                                                                                                                      |
| 1                                                                                                      | 40.48 ± 1.00                                                                                                           | 52.77 ± 0.53                                                                                                         |
| 2                                                                                                      | 28.91 ± 0.18                                                                                                           | 44.59 ± 0.30                                                                                                         |
| 3                                                                                                      | 34.07 ± 0.41                                                                                                           | 45.01 ± 0.28                                                                                                         |
| 4                                                                                                      | 26.74 ± 0.19                                                                                                           | 42.90 ± 0.42                                                                                                         |
| 5                                                                                                      | 26.66 ± 0.20                                                                                                           | 40.78 ± 0.37                                                                                                         |

**Table S13.** Summary of the luminescence decay of sample with 25 % Zn<sup>2+</sup> for the specific transitions <sup>4</sup>S<sub>3/2</sub>→<sup>4</sup>I<sub>15/2</sub> (green emissions) and <sup>4</sup>F<sub>9/2</sub>→<sup>4</sup>I<sub>15/2</sub> (red emissions).

| The content of Zn <sup>2+</sup> in relation to the amount of Gd <sup>3+</sup> in the starting material | Green luminescence lifetime (μs)<br>( <sup>4</sup> S <sub>3/2</sub> → <sup>4</sup> I <sub>15/2</sub> , <b>550 nm</b> ) | Red luminescence lifetime (μs)<br>( <sup>4</sup> F <sub>9/2</sub> → <sup>4</sup> I <sub>15/2</sub> , <b>660 nm</b> ) |
|--------------------------------------------------------------------------------------------------------|------------------------------------------------------------------------------------------------------------------------|----------------------------------------------------------------------------------------------------------------------|
| <b>25%</b>                                                                                             |                                                                                                                        |                                                                                                                      |
| 1                                                                                                      | 29.93 ± 0.29                                                                                                           | 46.11 ± 0.30                                                                                                         |
| 2                                                                                                      | 35.77 ± 0.28                                                                                                           | 49.16 ± 0.30                                                                                                         |
| 3                                                                                                      | 22.93 ± 0.08                                                                                                           | 42.29 ± 0.36                                                                                                         |
| 4                                                                                                      | 22.70 ± 0.09                                                                                                           | 41.63 ± 0.21                                                                                                         |
| 5                                                                                                      | 22.10 ± 0.09                                                                                                           | 40.89 ± 0.21                                                                                                         |

**Table S14.** Summary of the luminescence decay of sample with 50% Zn<sup>2+</sup> for the specific transitions <sup>4</sup>S<sub>3/2</sub>→<sup>4</sup>I<sub>15/2</sub> (green emissions) and <sup>4</sup>F<sub>9/2</sub>→<sup>4</sup>I<sub>15/2</sub> (red emissions).

| The content of Zn <sup>2+</sup> in relation<br>to the amount of Gd <sup>3+</sup> in the<br>starting material | Green luminescence<br>lifetime (μs)<br>( <sup>4</sup> S <sub>3/2</sub> → <sup>4</sup> I <sub>15/2</sub> , <b>550 nm</b> ) | Red luminescence<br>lifetime (μs)<br>( <sup>4</sup> F <sub>9/2</sub> → <sup>4</sup> I <sub>15/2</sub> , <b>660 nm</b> ) |
|--------------------------------------------------------------------------------------------------------------|---------------------------------------------------------------------------------------------------------------------------|-------------------------------------------------------------------------------------------------------------------------|
| <b>50%</b>                                                                                                   |                                                                                                                           |                                                                                                                         |
| 1                                                                                                            | 31.79 ± 0.13                                                                                                              | 86.49 ± 0.41                                                                                                            |
| 2                                                                                                            | 38.90 ± 0.19                                                                                                              | 72.38 ± 0.37                                                                                                            |
| 3                                                                                                            | 29.67 ± 0.11                                                                                                              | 67.37 ± 0.23                                                                                                            |
| 4                                                                                                            | 31.45 ± 0.20                                                                                                              | 72.75 ± 0.71                                                                                                            |
| 5                                                                                                            | 32.04 ± 0.14                                                                                                              | 81.13 ± 0.51                                                                                                            |

[1] Y. X. Li, W. F. Chen, X. Z. Zhou, Z. Y. Gu, Ch. M. Chen, *Materials Letters* **2005**, 59, 48–52.

[2] I. Kamińska, K. Fronc, B. Sikora, K. Koper, R. Minikayev, W. Paszkowicz, K. Sobczak, T. Wojciechowski, M. Chwastyk, A. Reszka, B. J. Kowalski, P. Stępień, D. Elbaum, *RSC Adv.*, **2014**, 4, 56596
